# Supplementary material
Source: MDPI journal article supplement (https://www.mdpi.com/2076-3298/8/11/123)
Supplement: s1 [file s1]

Supplemental Information For:

# **Exploring the Influence of Industrial and Climatic Variables on Communities of Benthic Macroinvertebrates Collected in Streams and Lakes in Canada's Oil Sands Region**

Tim J. Arciszewski

Resource Stewardship Division, Alberta Environment and Parks, Calgary, Alberta

[tima@unb.ca](mailto:tima@unb.ca); 403-351-0626

Submitted to: Environments

## Supplemental Tables

Supplemental Table S1 Cumulative land disturbances (%) for stream sites; calculated from ABMI 2018; STR=Steepbank River; JP=Jackpine Creek; MUR=Muskeg River; FB=Firebag River; ELR=Ells River; MAC=MacKay River; SHP=Shipyards Lake; ISL=Isadore's Lake; MCL=McClelland Lake; L=Lower; U=Upper; M=Middle; locations and watersheds shown in Figure 1; proportion of land disturbance (ALD) calculated as difference per year.

| Year | ELR   |       | FB    |       | JP    |       | MAC   |       | MUR    |        |        | STR   |       |
|------|-------|-------|-------|-------|-------|-------|-------|-------|--------|--------|--------|-------|-------|
|      | L     | U     | L     | U     | L     | U     | L     | M     | L      | M      | U      | L     | U     |
| 2000 | 0.341 | 0.359 | 0.055 | 0.074 | 0.784 | 0.343 | 0.556 | 0.552 | 2.676  | 2.780  | 0.693  | 0.290 | 0.007 |
| 2001 | 0.428 | 0.419 | 0.146 | 0.207 | 0.933 | 0.384 | 0.665 | 0.623 | 5.168  | 5.241  | 0.925  | 0.429 | 0.076 |
| 2002 | 0.453 | 0.430 | 0.153 | 0.219 | 1.579 | 1.300 | 0.701 | 0.637 | 6.142  | 6.271  | 1.047  | 0.560 | 0.077 |
| 2003 | 0.491 | 0.446 | 0.236 | 0.348 | 1.723 | 1.506 | 0.717 | 0.649 | 6.394  | 6.533  | 1.442  | 0.652 | 0.136 |
| 2004 | 0.550 | 0.479 | 0.377 | 0.392 | 1.937 | 1.597 | 0.793 | 0.718 | 6.967  | 7.138  | 1.638  | 0.755 | 0.223 |
| 2005 | 0.616 | 0.512 | 0.465 | 0.559 | 2.007 | 1.772 | 0.823 | 0.747 | 7.620  | 7.762  | 2.282  | 0.912 | 0.242 |
| 2006 | 0.649 | 0.523 | 0.520 | 0.642 | 2.660 | 1.803 | 0.848 | 0.755 | 8.918  | 9.108  | 2.670  | 1.141 | 0.308 |
| 2007 | 0.710 | 0.558 | 0.676 | 0.663 | 3.925 | 1.806 | 0.896 | 0.798 | 10.825 | 10.863 | 3.069  | 1.665 | 0.340 |
| 2008 | 0.784 | 0.603 | 0.766 | 0.718 | 4.254 | 1.808 | 1.025 | 0.893 | 11.496 | 11.569 | 3.361  | 2.840 | 0.440 |
| 2009 | 0.856 | 0.644 | 1.158 | 0.730 | 4.915 | 2.533 | 1.147 | 0.982 | 12.183 | 12.285 | 4.314  | 3.064 | 0.449 |
| 2010 | 0.878 | 0.669 | 1.254 | 0.762 | 5.307 | 2.554 | 1.214 | 1.035 | 13.323 | 13.479 | 4.939  | 3.775 | 0.449 |
| 2011 | 0.884 | 0.672 | 1.421 | 0.829 | 5.387 | 2.590 | 1.308 | 1.087 | 14.476 | 14.578 | 5.521  | 4.006 | 0.479 |
| 2012 | 1.370 | 0.757 | 1.566 | 0.897 | 5.449 | 2.598 | 1.477 | 1.178 | 15.949 | 16.128 | 6.495  | 4.236 | 0.498 |
| 2013 | 1.541 | 0.764 | 1.800 | 0.952 | 5.486 | 2.634 | 1.561 | 1.233 | 16.567 | 16.736 | 7.911  | 4.422 | 0.501 |
| 2014 | 1.603 | 0.765 | 1.896 | 0.979 | 5.499 | 2.642 | 1.595 | 1.270 | 17.219 | 17.425 | 9.673  | 4.642 | 0.502 |
| 2015 | 1.606 | 0.768 | 1.920 | 1.045 | 5.529 | 2.690 | 1.607 | 1.282 | 17.479 | 17.696 | 10.259 | 4.693 | 0.519 |

Supplemental Table S2 Cumulative land disturbance (%) for the four study lakes per study year; proportion of land disturbance (ALD) calculated as difference per year; locations and watersheds shown in Figure 1.

| Year | Lake      |       |            |          |
|------|-----------|-------|------------|----------|
|      | Isadore's | Kearl | McClelland | Shipyard |
| 2000 | 11.47     | 1.49  | 0.12       | 8.52     |
| 2001 | 23.47     | 1.90  | 0.29       | 10.53    |
| 2002 | 26.02     | 1.91  | 0.30       | 16.03    |
| 2003 | 27.15     | 2.43  | 0.48       | 16.04    |
| 2004 | 29.76     | 2.51  | 4.11       | 29.70    |
| 2005 | 29.78     | 2.77  | 4.11       | 45.87    |
| 2006 | 29.78     | 3.08  | 4.12       | 66.38    |
| 2007 | 30.14     | 3.08  | 7.77       | 75.01    |
| 2008 | 32.03     | 3.09  | 8.56       | 84.58    |
| 2009 | 32.03     | 4.07  | 8.76       | 84.59    |
| 2010 | 32.10     | 4.50  | 8.83       | 84.63    |
| 2011 | 38.73     | 4.64  | 9.36       | 84.63    |
| 2012 | 40.01     | 8.07  | 9.36       | 84.63    |
| 2013 | 43.54     | 8.27  | 9.66       | 85.23    |
| 2014 | 43.96     | 8.42  | 9.96       | 85.23    |
| 2015 | 44.61     | 8.42  | 9.96       | 85.23    |

Supplemental Table S3 Selection rates, ranks, counts per BMI index, and number of sites with a selected variable of industrial and climatic variables returned by EN using a lower limit of zero (0) for industrial variables and no constraints for MSP, MST, and MSWS; TA=total abundance; TR=taxon richness; EPT=percent EPT; EQ=equitability; NA=not applicable; 19 models were intercept only; variable codes defined in main article body (See Section 2.2)

| Feature | Models with feature | Feature selection rate (%) | Selection rank for industrial features | Selection rank among all features |
|---------|---------------------|----------------------------|----------------------------------------|-----------------------------------|
| MST     | 19                  | 27.94                      | NA                                     | 1                                 |
| MSWS    | 19                  | 27.94                      | NA                                     | 1                                 |
| MSP     | 14                  | 20.59                      | NA                                     | 3                                 |
| SML-FPU | 14                  | 20.59                      | 1                                      | 3                                 |
| JPM-CBP | 13                  | 19.12                      | 2                                      | 5                                 |
| CLD     | 11                  | 16.18                      | 3                                      | 6                                 |
| KM-CBP  | 11                  | 16.18                      | 3                                      | 6                                 |
| SBM-FPU | 11                  | 16.18                      | 3                                      | 6                                 |
| HM-PCP  | 10                  | 14.71                      | 6                                      | 9                                 |
| SBM-SCP | 9                   | 13.24                      | 7                                      | 10                                |
| SML-CBP | 9                   | 13.24                      | 7                                      | 10                                |
| SML-PCP | 9                   | 13.24                      | 7                                      | 10                                |
| HM-PCS  | 8                   | 11.76                      | 10                                     | 13                                |
| SAN-CBP | 8                   | 11.76                      | 10                                     | 13                                |
| SML-SCP | 8                   | 11.76                      | 10                                     | 13                                |
| HM-CBP  | 7                   | 10.29                      | 13                                     | 16                                |
| HM-SCP  | 7                   | 10.29                      | 13                                     | 16                                |
| SBM-PCP | 7                   | 10.29                      | 13                                     | 16                                |
| ALD     | 6                   | 8.82                       | 16                                     | 19                                |
| MRM-CBP | 6                   | 8.82                       | 16                                     | 19                                |
| SBM-CBP | 6                   | 8.82                       | 16                                     | 19                                |
| SFB-B   | 6                   | 8.82                       | 16                                     | 19                                |
| SML-PCS | 6                   | 8.82                       | 16                                     | 19                                |
| SMR-B   | 5                   | 7.35                       | 21                                     | 24                                |
| SBMPCS  | 5                   | 7.35                       | 21                                     | 24                                |
| SMR-ST  | 4                   | 5.88                       | 23                                     | 26                                |
| SFB-ST  | 2                   | 2.94                       | 24                                     | 27                                |

Supplemental Table S4 Selection rates, ranks, counts per BMI index, and number of sites with a selected variable of in-dustrial and climatic variables returned by EN with no constraints for any variables MSP, MST, and MSWS; TA=total abundance; TR=taxon richness; EPT=percent EPT; EQ=equitability; NA=not ap-plicable; 15 models were intercept only; variable codes defined in main article body (See Section 2.2).

| Feature | Feature selection count | Proportional selection rate (%) | Rank of all $\beta$ for industrial features | Positive (+) $\beta$ coefficients | Negative (-) $\beta$ coefficients | Rank of + $\beta$ for industrial features | Rank of - $\beta$ for industrial features | Rank of + $\beta$ for all features | Rank of - $\beta$ for all features |
|---------|-------------------------|---------------------------------|---------------------------------------------|-----------------------------------|-----------------------------------|-------------------------------------------|-------------------------------------------|------------------------------------|------------------------------------|
| JPM-CBP | 17                      | 25.00                           | 1                                           | 12                                | 5                                 | 1                                         | 5                                         | 1                                  | 8                                  |
| SML-FPU | 17                      | 25.00                           | 1                                           | 12                                | 5                                 | 1                                         | 5                                         | 1                                  | 8                                  |
| MST     | 16                      | 23.53                           | NA                                          | 6                                 | 10                                | NA                                        | NA                                        | 15                                 | 1                                  |
| SBM-FPU | 16                      | 23.53                           | 3                                           | 6                                 | 10                                | 15                                        | 1                                         | 15                                 | 1                                  |
| HM-PCP  | 15                      | 22.06                           | 4                                           | 10                                | 5                                 | 4                                         | 5                                         | 4                                  | 8                                  |
| KM-CBP  | 15                      | 22.06                           | 4                                           | 9                                 | 6                                 | 5                                         | 3                                         | 5                                  | 6                                  |
| MSWS    | 14                      | 20.59                           | NA                                          | 5                                 | 9                                 | NA                                        | NA                                        | 19                                 | 3                                  |
| HM-CBP  | 14                      | 20.59                           | 6                                           | 9                                 | 5                                 | 5                                         | 5                                         | 5                                  | 8                                  |
| HM-SCP  | 14                      | 20.59                           | 6                                           | 9                                 | 5                                 | 5                                         | 5                                         | 5                                  | 8                                  |
| MRM-CBP | 13                      | 19.12                           | 8                                           | 5                                 | 8                                 | 18                                        | 2                                         | 19                                 | 4                                  |
| SAN-CBP | 13                      | 19.12                           | 8                                           | 8                                 | 5                                 | 9                                         | 5                                         | 9                                  | 8                                  |
| SBM-CBP | 13                      | 19.12                           | 8                                           | 8                                 | 5                                 | 9                                         | 5                                         | 9                                  | 8                                  |
| SBM-SCP | 12                      | 17.65                           | 11                                          | 9                                 | 3                                 | 5                                         | 16                                        | 5                                  | 19                                 |
| SML-PCP | 12                      | 17.65                           | 11                                          | 8                                 | 4                                 | 9                                         | 13                                        | 9                                  | 16                                 |
| SML-SCP | 12                      | 17.65                           | 11                                          | 11                                | 1                                 | 3                                         | 20                                        | 3                                  | 23                                 |
| MSP     | 11                      | 16.18                           | NA                                          | 4                                 | 7                                 | NA                                        | NA                                        | 23                                 | 5                                  |
| HM-PCS  | 11                      | 16.18                           | 14                                          | 8                                 | 3                                 | 9                                         | 16                                        | 9                                  | 19                                 |
| SBM-PCP | 11                      | 16.18                           | 14                                          | 7                                 | 4                                 | 14                                        | 13                                        | 14                                 | 16                                 |
| SML-CBP | 11                      | 16.18                           | 14                                          | 5                                 | 6                                 | 18                                        | 3                                         | 19                                 | 6                                  |
| SMR-ST  | 10                      | 14.71                           | 17                                          | 6                                 | 4                                 | 15                                        | 13                                        | 15                                 | 16                                 |
| CLD     | 9                       | 13.24                           | 18                                          | 8                                 | 1                                 | 9                                         | 20                                        | 9                                  | 23                                 |
| ALD     | 9                       | 13.24                           | 18                                          | 4                                 | 5                                 | 21                                        | 5                                         | 23                                 | 8                                  |
| SMR-B   | 9                       | 13.24                           | 18                                          | 6                                 | 3                                 | 15                                        | 16                                        | 15                                 | 19                                 |
| SBM-PCS | 6                       | 8.82                            | 21                                          | 4                                 | 2                                 | 21                                        | 19                                        | 23                                 | 22                                 |
| SML-PCS | 6                       | 8.82                            | 21                                          | 5                                 | 1                                 | 18                                        | 20                                        | 19                                 | 23                                 |
| SFB-B   | 4                       | 5.88                            | 23                                          | 4                                 | 0                                 | 21                                        | 23                                        | 23                                 | 26                                 |
| SFB-ST  | 3                       | 4.41                            | 24                                          | 3                                 | 0                                 | 24                                        | 23                                        | 27                                 | 26                                 |

Supplemental Table S5 Results of Elastic Net variable selection for additional sites east of the Athabasca River; variable codes defined in main article body (See Section 2.2); Locations shown in Figure 1; TA=total abundance; TR=taxon richness; EPT=percent EPT; EQ=equitability).

| BMII | Feature   | Firebag                |                        | Muskeg River           |                        |                        | Lakes                  |                        |                        |
|------|-----------|------------------------|------------------------|------------------------|------------------------|------------------------|------------------------|------------------------|------------------------|
|      |           | FB-L                   | FB-U                   | MUR-L                  | MUR-M                  | MUR-U                  | ISL                    | KEL                    | MCL                    |
| TA   | DR        | 0                      | 0.95                   | 0.70                   | 0.59                   | 0.19                   | 0.23                   | $8.0 \times 10^{-17}$  | 0.36                   |
|      | Intercept | $3.1 \times 10^{-16}$  | $2.4 \times 10^{-16}$  | $-2.5 \times 10^{-16}$ | $-5.9 \times 10^{-16}$ | $-1.2 \times 10^{-15}$ | $-6.8 \times 10^{-16}$ | $1.1 \times 10^{-16}$  | $6.2 \times 10^{-16}$  |
|      | ALD       |                        | -0.419                 | -0.376                 |                        |                        |                        |                        |                        |
|      | MSWS      |                        | 0.025                  | 0.096                  | 0.050                  | -0.186                 | -0.184                 |                        |                        |
|      | MST       |                        |                        |                        | 0.404                  |                        |                        |                        | 0.341                  |
|      | MRM-CBP   |                        |                        |                        | -0.321                 |                        |                        |                        |                        |
|      | MSP       |                        |                        | -0.501                 | -0.121                 |                        |                        |                        |                        |
|      | SAN-CBP   |                        |                        |                        | -0.346                 |                        |                        |                        |                        |
|      | SBM-FPU   |                        | -0.572                 | -0.278                 |                        |                        |                        |                        | -0.041                 |
|      | SMR-ST    |                        |                        |                        | -0.014                 |                        |                        |                        |                        |
| EPT  | SML-CBP   |                        | -0.068                 |                        |                        |                        |                        | $-7.1 \times 10^{-17}$ |                        |
|      | DR        | 0.000                  | >0.99                  | 0.00                   | 0.26                   | 0.00                   | 0.899                  | 0.00                   | 0.56                   |
|      | Intercept | $-4.2 \times 10^{-17}$ | $-2.7 \times 10^{-15}$ | $2.4 \times 10^{-16}$  | $3.7 \times 10^{-16}$  | $9.0 \times 10^{-17}$  | $-6.1 \times 10^{-16}$ | $5.6 \times 10^{-17}$  | $-1.1 \times 10^{-15}$ |
|      | MSWS      |                        |                        |                        |                        |                        | -0.416                 |                        | -0.093                 |
|      | MST       |                        |                        |                        | 0.002                  |                        | -0.054                 |                        | -0.079                 |
|      | MSP       |                        | 0.062                  |                        |                        |                        |                        |                        | 0.019                  |
|      | SBM-CBP   |                        | -0.102                 |                        |                        |                        |                        |                        |                        |
|      | SBM-FPU   |                        |                        |                        | -0.140                 |                        | -0.260                 |                        | -0.405                 |
|      | SBM-PCS   |                        | -0.196                 |                        |                        |                        |                        |                        |                        |
|      | SBM-PCP   |                        | -0.275                 |                        |                        |                        |                        |                        |                        |
|      | SBM-SCP   |                        | -0.351                 |                        |                        |                        |                        |                        |                        |
|      | SML-CBP   |                        | -0.079                 |                        | -0.176                 |                        |                        |                        |                        |
|      | SML-FPU   |                        | -0.084                 |                        |                        |                        | -0.068                 |                        | -0.084                 |
|      | SML-PCP   |                        | -0.078                 |                        |                        |                        | -0.069                 |                        | -0.085                 |
|      | SML-PCS   |                        | -0.073                 |                        |                        |                        |                        |                        |                        |
| EQ   | SML-SCP   |                        | -0.057                 |                        |                        |                        |                        |                        |                        |
|      | DR        | 0.58                   | 0.19                   | 0.17                   | 0.00                   | 0.55                   | 0.44                   | 0.00                   | 0.07                   |
|      | Intercept | $8.8 \times 10^{-16}$  | $1.0 \times 10^{-16}$  | $1.6 \times 10^{-16}$  | $1.9 \times 10^{-16}$  | $-3.6 \times 10^{-16}$ | $3.5 \times 10^{-16}$  | $-6.2 \times 10^{-17}$ | $-2.3 \times 10^{-16}$ |
|      | CLD       |                        | -0.013                 |                        |                        |                        |                        |                        |                        |
|      | ALD       |                        |                        |                        |                        | -0.009                 |                        |                        |                        |
|      | HM-CBP    |                        |                        | -0.058                 |                        |                        |                        |                        |                        |
|      | HM-PCP    |                        |                        | -0.020                 |                        |                        |                        |                        |                        |
|      | HM-PCS    |                        |                        | -0.082                 |                        |                        |                        |                        |                        |
|      | HM-SCP    |                        |                        | -0.058                 |                        |                        |                        |                        |                        |
|      | MSWS      |                        |                        |                        |                        |                        | 0.266                  |                        |                        |
|      | JPM-CBP   |                        | -0.010                 |                        |                        | -0.005                 |                        |                        |                        |
|      | KM-CBP    | -0.042                 |                        | -0.006                 |                        | -0.518                 |                        |                        |                        |
|      | MST       | -0.351                 |                        |                        |                        |                        |                        |                        | -0.046                 |
|      | MSP       | -0.045                 |                        |                        |                        | -0.090                 |                        |                        |                        |
|      | SBM-CBP   | -0.111                 |                        |                        |                        |                        |                        |                        |                        |
|      | SMR-ST    |                        |                        |                        |                        |                        | -0.165                 |                        |                        |
|      | SBM-PCS   |                        | -0.033                 |                        |                        |                        |                        |                        |                        |
|      | SBM-PCP   | -0.037                 |                        |                        |                        |                        |                        |                        | -0.015                 |
|      | SML-CBP   | -0.285                 |                        |                        |                        | -0.172                 |                        |                        |                        |
| TR   | SML-PCS   |                        | -0.057                 |                        |                        |                        |                        |                        |                        |
|      | DR        | 0                      | 0.20                   | 0.38                   | 0.81                   | 0.16                   | 0.78                   | 0.41                   | 0.15                   |
|      | Intercept | $-1.1 \times 10^{-16}$ | $2.7 \times 10^{-15}$  | $1.9 \times 10^{-15}$  | $-4.5 \times 10^{-16}$ | $-3.3 \times 10^{-16}$ | $-1.7 \times 10^{-15}$ | $3.8 \times 10^{-16}$  | $3.8 \times 10^{-16}$  |
|      | ALD       |                        | -0.115                 |                        | -0.103                 |                        |                        |                        |                        |
|      | HM-CBP    |                        |                        |                        |                        |                        | -0.041                 |                        |                        |
|      | HM-PCP    |                        |                        |                        |                        |                        | -0.088                 |                        |                        |
|      | HM-SCP    |                        |                        |                        |                        |                        | -0.046                 |                        |                        |
|      | MSWS      |                        |                        | 0.365                  |                        | -0.158                 | -0.543                 | -0.131                 |                        |
|      | MST       |                        |                        |                        | 0.550                  |                        |                        |                        | 0.114                  |
|      | MRM-CBP   |                        |                        |                        | -0.671                 |                        |                        |                        |                        |
|      | MSP       |                        |                        | -0.192                 | -0.102                 |                        |                        |                        |                        |
|      | SAN-CBP   |                        |                        |                        | -0.233                 |                        |                        |                        |                        |
|      | SBM-CBP   |                        |                        |                        | -0.146                 |                        |                        |                        |                        |
|      | SBM-FPU   |                        | -0.075                 | -0.019                 | -0.704                 |                        |                        | -0.187                 |                        |
|      | SML-CBP   |                        |                        |                        |                        |                        |                        | -0.029                 |                        |
|      | SML-FPU   |                        |                        |                        |                        |                        | -0.077                 | -0.079                 |                        |
|      | SML-PCP   |                        |                        |                        |                        |                        | -0.077                 |                        |                        |

Supplemental Table S6 Results of Elastic Net variable selection for additional sites east of the Athabasca River; variable codes defined in main article body (See Section 2.2); Locations shown in Figure 1; TA=total abundance; TR=taxon richness; EPT=percent EPT; EQ=equitability).

| BMII | Feature   | Ells                    |                         | MacKay                  |                         |
|------|-----------|-------------------------|-------------------------|-------------------------|-------------------------|
|      |           | ELR-L                   | ELR-U                   | MAC-L                   | MAC-M                   |
| TA   | DR        | 0                       | 0.36                    | 0.57                    | 0.93                    |
|      | Intercept | $-9.02 \times 10^{-17}$ | $-2.85 \times 10^{-15}$ | $-9.85 \times 10^{-16}$ | $-5.12 \times 10^{-15}$ |

|     |           |                         |                         |                         |                         |
|-----|-----------|-------------------------|-------------------------|-------------------------|-------------------------|
|     | HM-CBP    |                         |                         |                         | -0.018                  |
|     | HM-SCP    |                         |                         |                         | -0.017                  |
|     | MSWS      |                         | -0.069                  | 0.418                   | 0.992                   |
|     | MST       |                         |                         | -0.602                  | -0.650                  |
|     | MRM-CBP   |                         | -0.265                  |                         | -0.115                  |
|     | MSP       |                         |                         | -0.558                  | -0.379                  |
|     | SFB-B     |                         |                         | -0.189                  |                         |
|     | SBM-FPU   |                         |                         |                         | -0.442                  |
|     | SMR-B     |                         |                         |                         | -0.037                  |
|     | SMR-ST    |                         |                         |                         | -0.105                  |
|     | SML-CBP   |                         |                         |                         | -0.439                  |
|     | SML-FPU   |                         |                         | -0.133                  | -0.265                  |
|     | SML-PCP   |                         |                         |                         | -0.265                  |
| EPT | DR        | 0                       | 0.10                    | 0                       | 0.67                    |
|     | Intercept | $-8.33 \times 10^{-17}$ | $2.92 \times 10^{-16}$  | $1.80 \times 10^{-16}$  | $2.44 \times 10^{-16}$  |
|     | MSWS      |                         |                         |                         | -0.259                  |
|     | JPM-CBP   |                         |                         |                         | -0.047                  |
|     | MSP       |                         | -0.073                  |                         | -0.113                  |
|     | SBM-FPU   |                         | -0.037                  |                         | -0.576                  |
| EQ  | DR        | 0                       | 0.23                    | <0.01                   | 0.51                    |
|     | Intercept | $2.48 \times 10^{-16}$  | $-4.28 \times 10^{-16}$ | $2.84 \times 10^{-16}$  | $1.31 \times 10^{-15}$  |
|     | WS        |                         |                         |                         | -0.961                  |
|     | KM-CBP    |                         |                         |                         | -0.734                  |
|     | MST       |                         | -0.160                  |                         | -0.119                  |
|     | MSP       |                         |                         |                         | -0.021                  |
|     | SBM-CBP   |                         |                         | $-3.79 \times 10^{-17}$ |                         |
| TR  | DR        | 0.26                    | 0.88                    | 0                       | $3.1 \times 10^{-17}$   |
|     | Intercept | $2.81 \times 10^{-16}$  | $-9.95 \times 10^{-16}$ | $1.39 \times 10^{-17}$  | $-7.77 \times 10^{-16}$ |
|     | MSWS      | 0.113                   |                         |                         |                         |
|     | KM-CBP    | -0.135                  |                         |                         |                         |
|     | MRM-CBP   |                         | -0.279                  |                         | $-4 \times 10^{-17}$    |
|     | MSP       | -0.032                  | -0.057                  |                         |                         |
|     | SBM-CBP   |                         | -0.023                  |                         |                         |
|     | SBM-FPU   |                         | -0.812                  |                         |                         |

Supplemental Figures

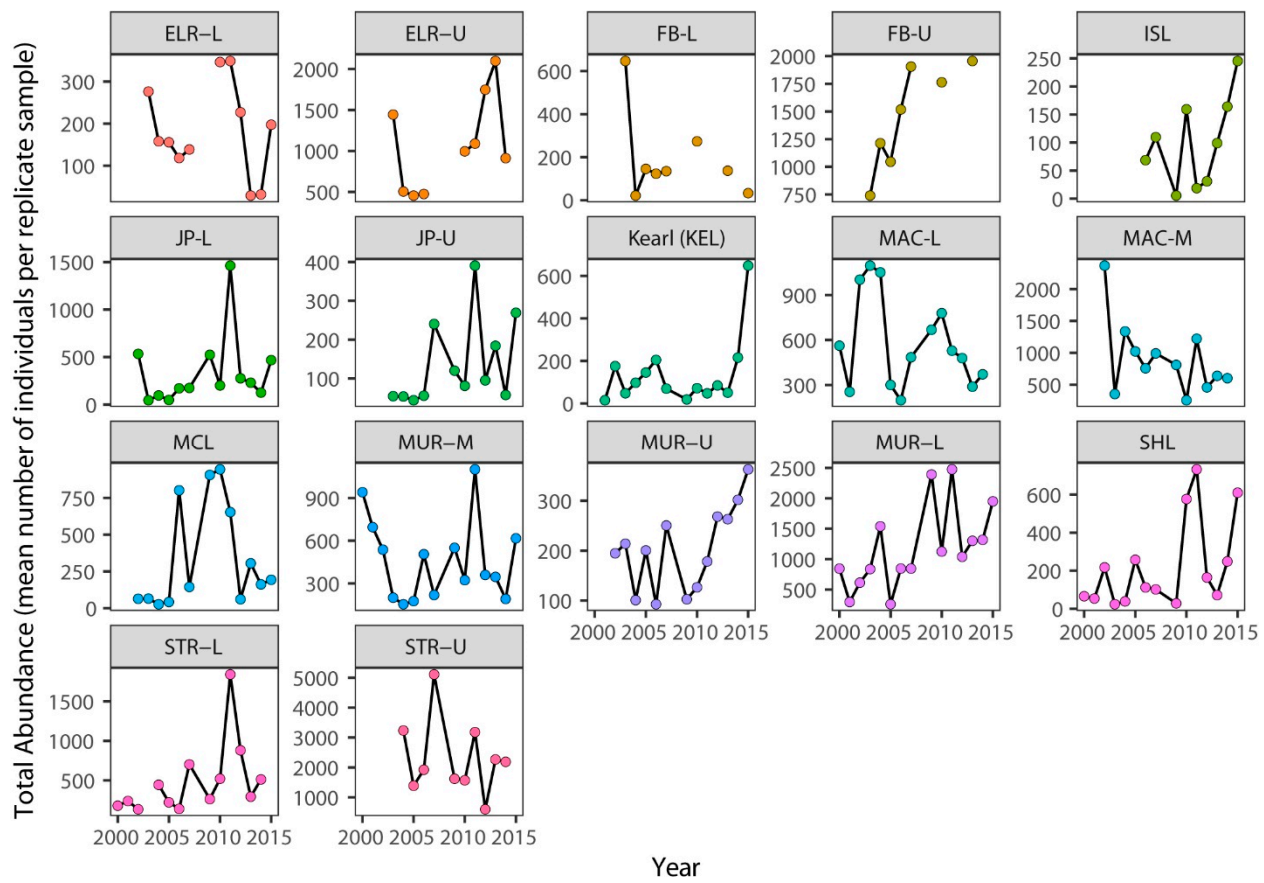

Supplemental Figure S1 Total abundance of benthic macroinvertebrates from RAMP.



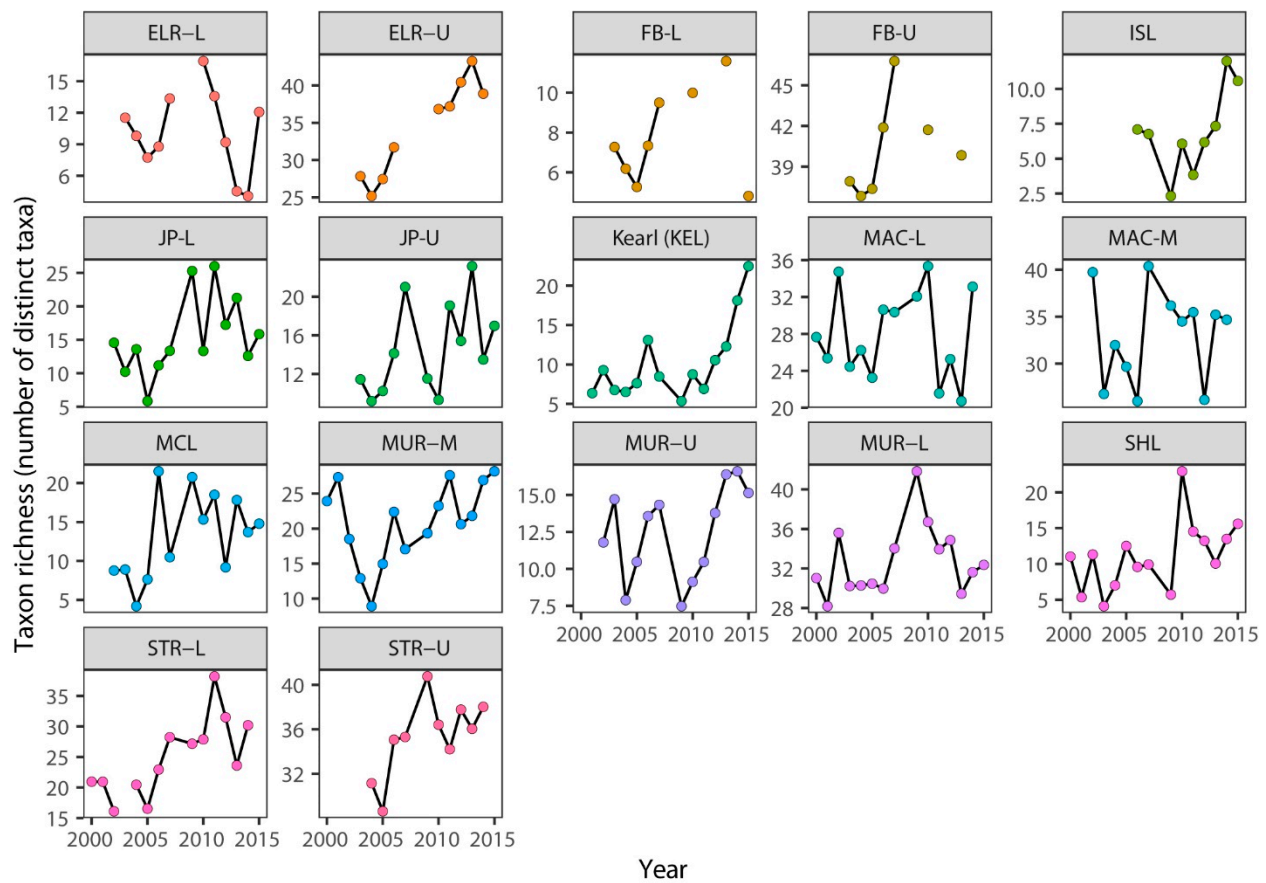

Supplemental Figure S2 Taxon richness of benthic macroinvertebrates from RAMP.

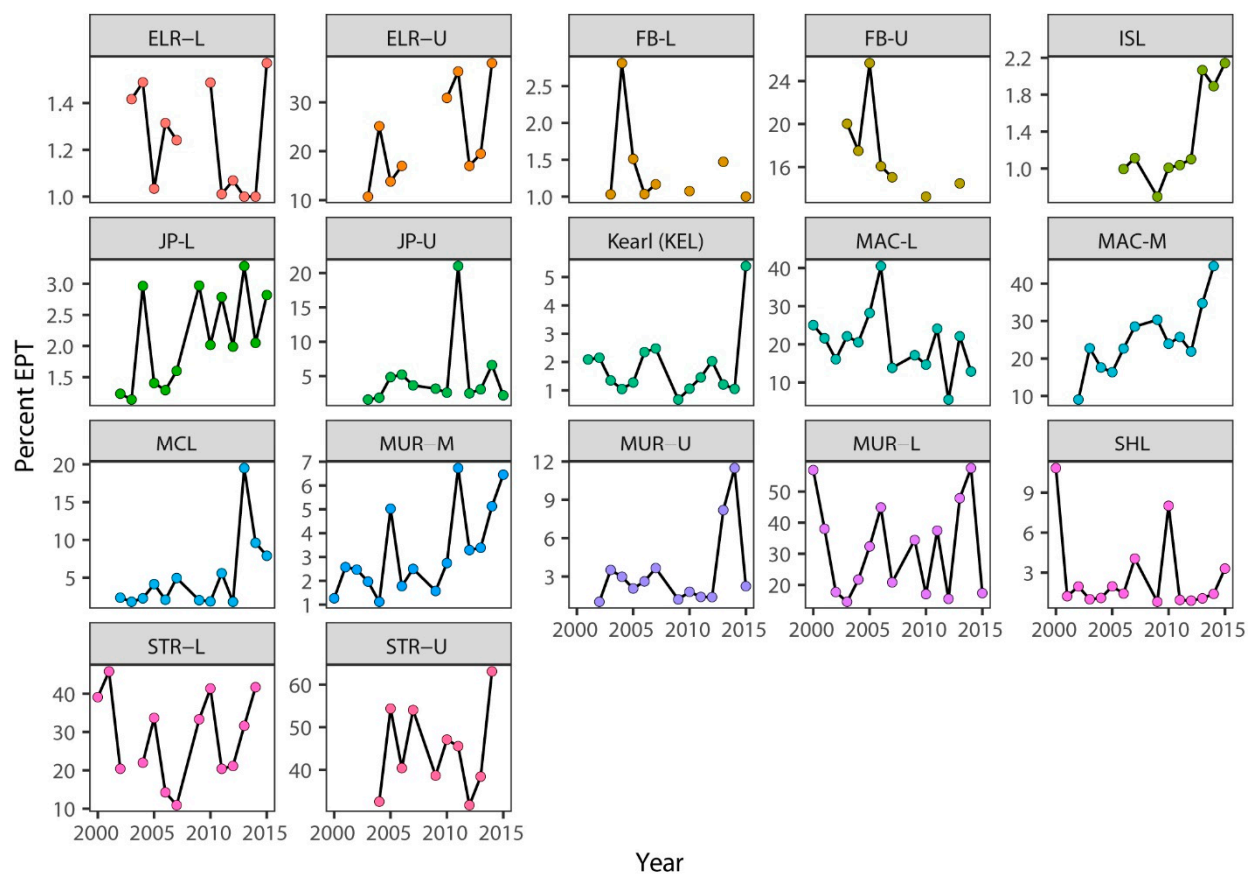

Supplemental Figure S3 Percent EPT of benthic macroinvertebrates data from RAMP.

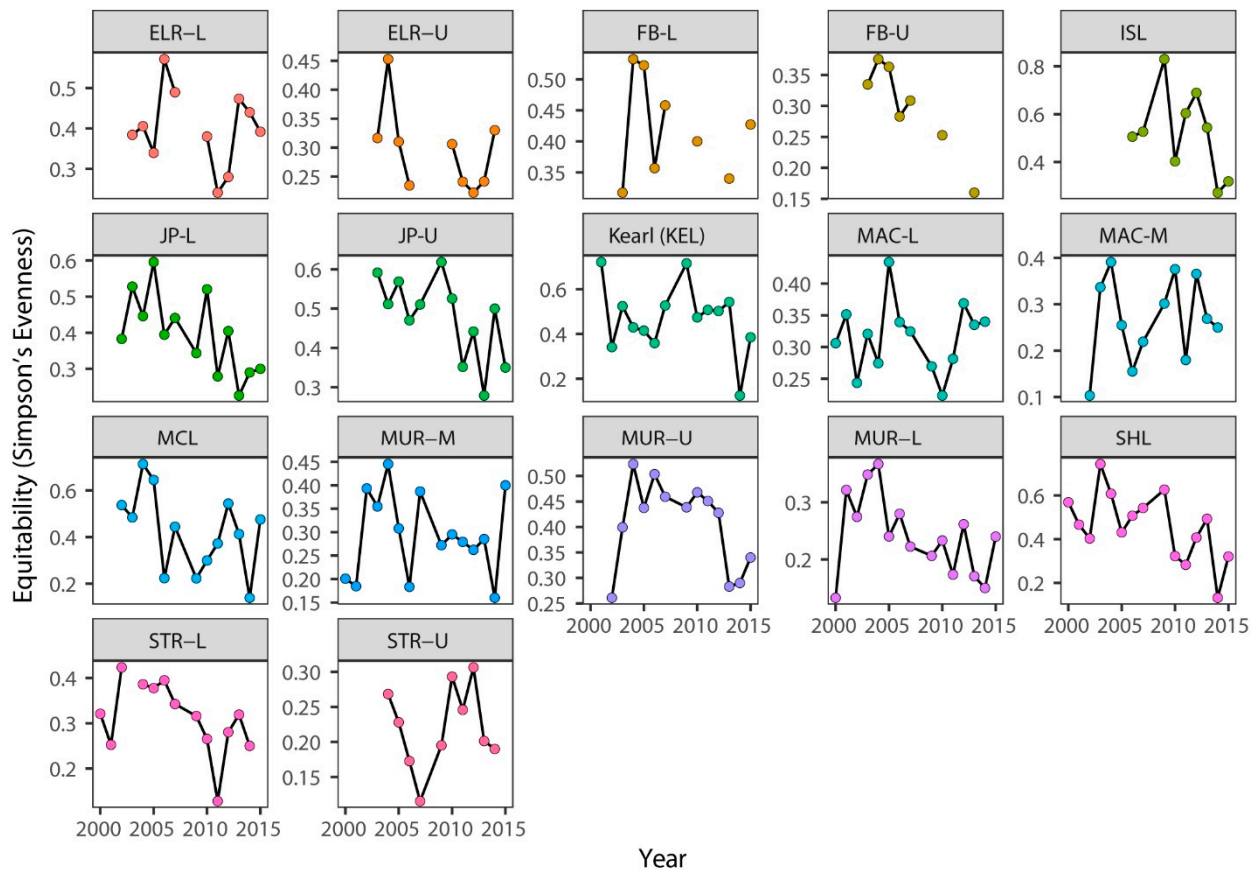

Supplemental Figure S4 Equitability of benthic macroinvertebrates from RAMP.

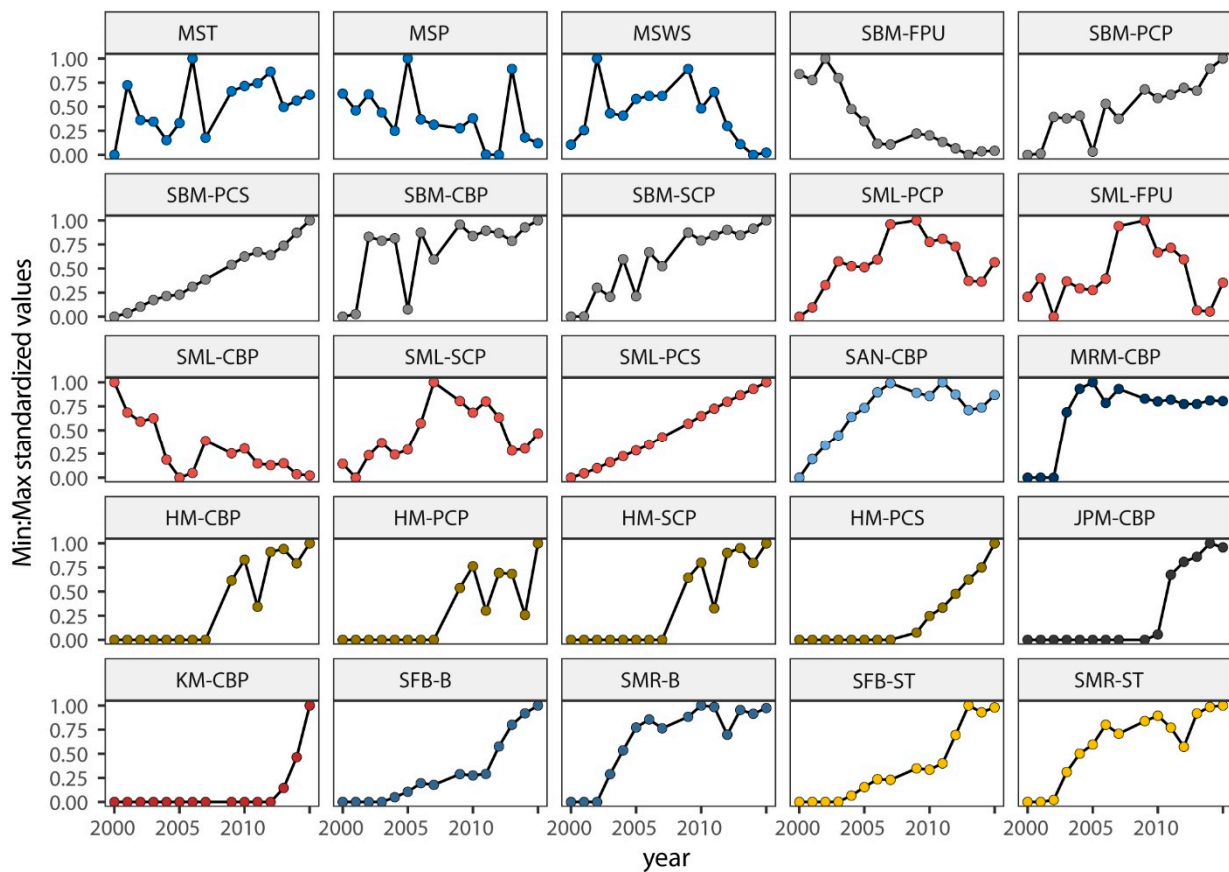

Supplemental Figure S5 Selectable industry (and 'climatic'[MSP, MST, MSWS]) variables obtained for EN; values standardized to minimum and maximum values per variable (minimum=0; maximum=1); MST = mean summer temperature; MSP = mean summer precipitation; MSWS = mean summer wind speed; Suncor Basemine =SBM, Syncrude Mildred Lake = SML, Horizon Mine = HM, Syncrude Aurora North = SAN, Muskeg River Mine = MRM, Jackpine Mine = JPM, Kearl Mine = KM, Suncor Firebag in situ = SFB, and Suncor MacKay River in situ = SMR; fuel/plant use of petroleum coke =FPU, petroleum coke production = PCP, closing inventory of petcoke stockpiles = PCS, crude bitumen production = CBP, synthetic crude production = SCP ; bitumen production = B; steam injection = ST.

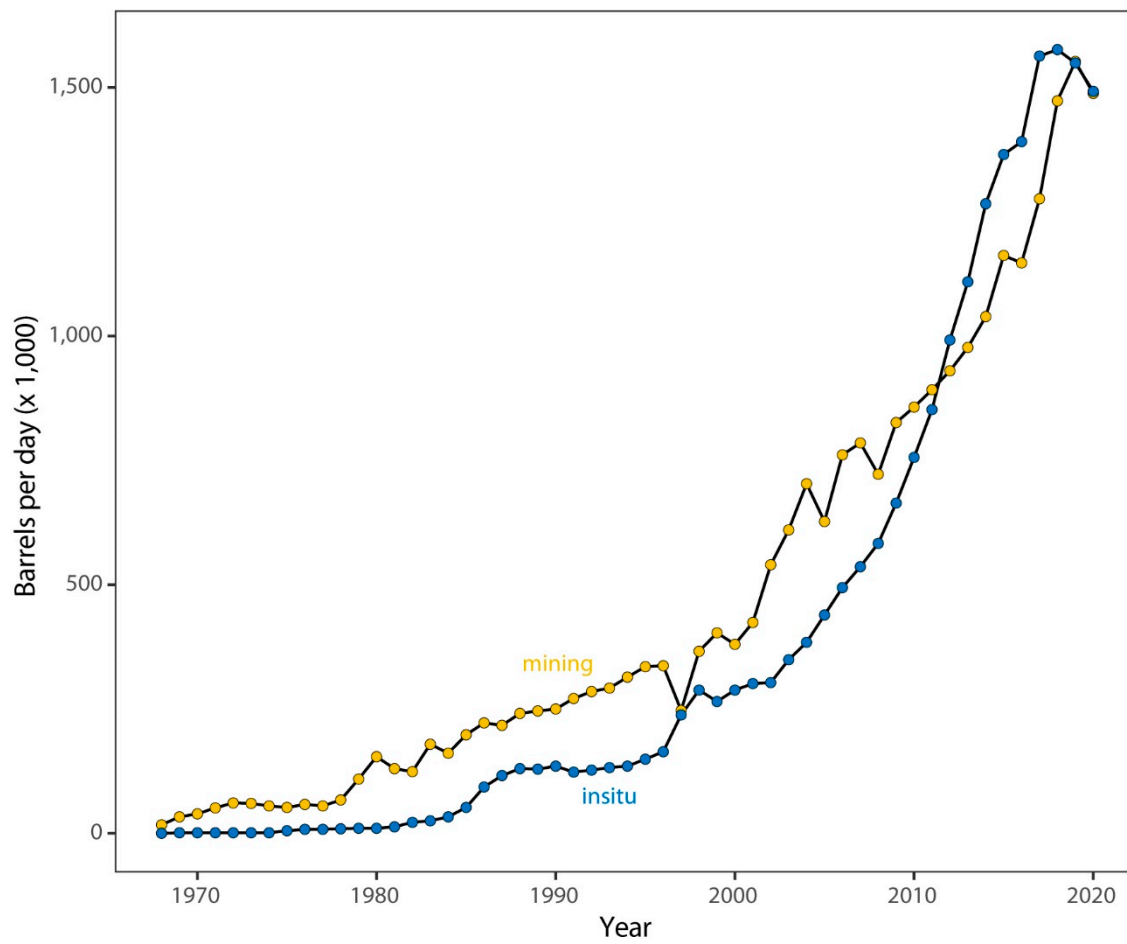

Supplemental Figure S6 Mining and in situ production (thousands of barrels per day) over time; data obtained from [www.oilsandsmagazine.com](http://www.oilsandsmagazine.com) [accessed on 5 October 2021].
